# Supplementary material for: The microbiota and T cells non-genetically modulate inherited phenotypes transgenerationally
Source: PubMed Central journal article supplement (PMC11102039; doi:10.1016/j.celrep.2024.114029), 2024-04-04
Supplement: NIHMS1988696-supplement-1.pdf [file NIHMS1988696-supplement-1.pdf]

**Supplemental information**

**The microbiota and T cells non-genetically  
modulate inherited phenotypes transgenerationally**

**Jordan C. Harris, Natalie A. Trigg, Bruktawit Goshu, Yuichi Yokoyama, Lenka Dohnalová, Ellen K. White, Adele Harman, Sofía M. Murga-Garrido, Jamie Ting-Chun Pan, Preeti Bhanap, Christoph A. Thaiss, Elizabeth A. Grice, Colin C. Conine, and Taku Kambayashi**

# 1 Supplemental Items

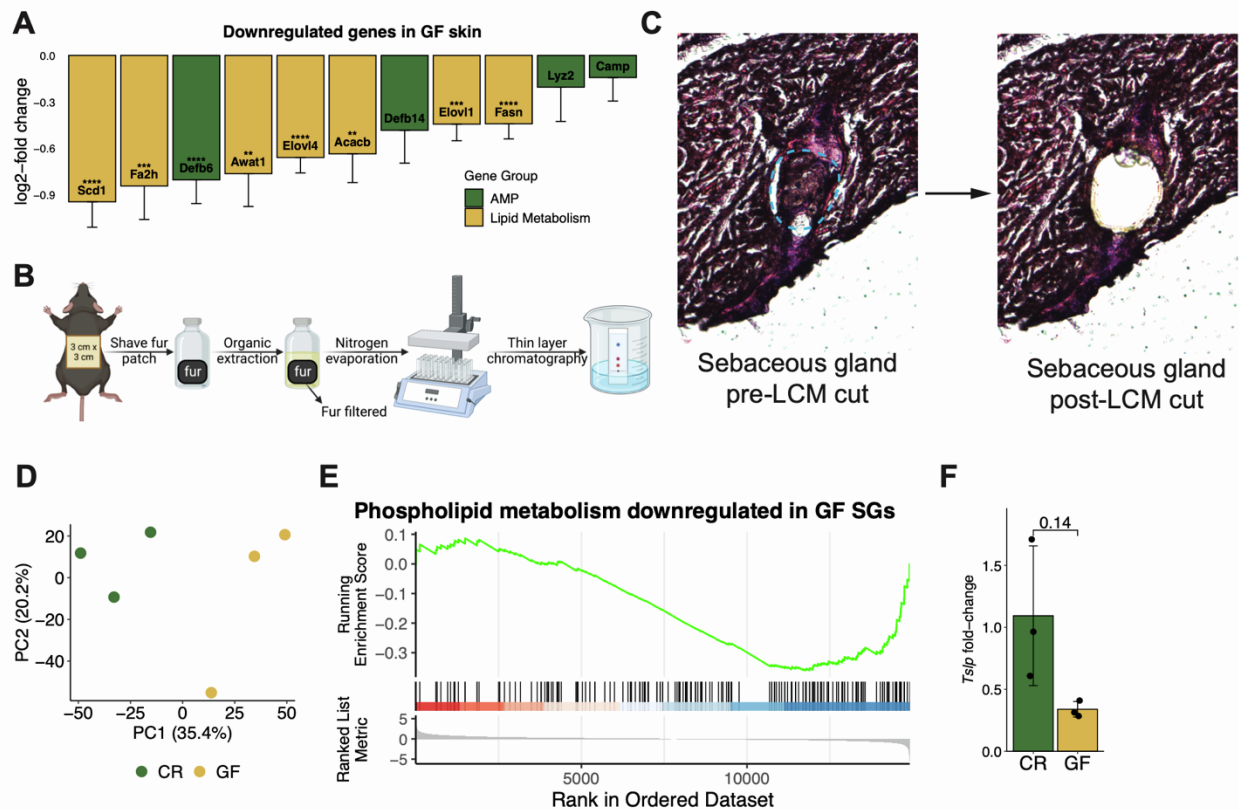

2  
3 **Figure S1. Skin and SG transcriptional profiles are dysregulated in GF mice, Related to**  
4 **Figure 1. (A)** mRNA expression of lipid-associated and antimicrobial peptide genes in GF mice  
5 compared to CR mouse epidermis ( $n = 8$  mice/group).  $p$  values are indicated on the y-axis, based  
6 on Fisher's exact test and FDR-adjusted. **(B)** Schematic detailing the thin layer chromatography  
7 method for extracting and measuring sebum secretion. **(C)** Visual representation of SG tissue  
8 isolated using LCM. **(D)** Principal component analysis showing principal component 1 (PC1) and  
9 PC2 for RNA-seq from the SG of CR or GF mouse skin ( $n = 3$  mice/group). **(E)** GSEA plot  
10 displaying downregulated phospholipid pathway in the GF SG using BH-adjusted  $P$  value  $< 0.05$ .  
11 Genes shown in ranked order by running enrichment scores. **(F)** Skin mRNA expression of *Tslp*  
12 ( $n = 3$  mice/group, qPCR normalized to *Gapdh* expression). No label, not significant,  $**p < 0.01$ ,

- 13 \*\*\* $p < 0.001$ , \*\*\*\* $p < 0.0001$ , by Fisher's exact test, FDR-adjusted. Data are shown as mean  $\pm$
- 14 SD.

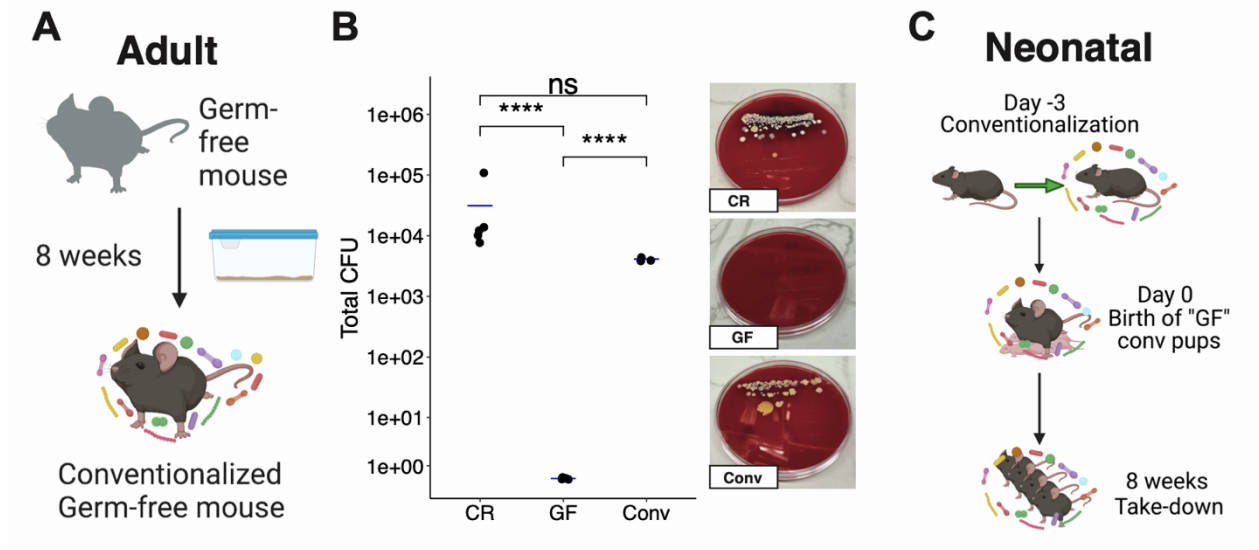

15

16 **Figure S2. A similar bacterial burden in GF breeding combinations led to differential *Tslp***

17 **expression and T cell number in GF×GF F<sub>1</sub> skin, Related to Figure 2. (A) Schematic**

18 **representing adult GF conventionalization techniques, whereby 8 week-old adult mice are**

19 **introduced to a cage containing CR bedding and cage material for 8 weeks. (B) Colony forming**

20 **unit (CFU) quantification from back swabs of CR, GF and conventionalized adult mice post 8**

21 **weeks of colonization. (C) Schematic representing neonatal GF conventionalization techniques,**

22 **whereby a pregnant GF mouse is introduced to a cage containing CR bedding and cage material,**

23 **giving birth to GF-derived neonatally conventionalized mice. All experiments performed 2-3**

24 **times. ns, not significant, \*\*\*\**p* < 0.0001 by Student *t* test. Data are shown as mean ± SD.**

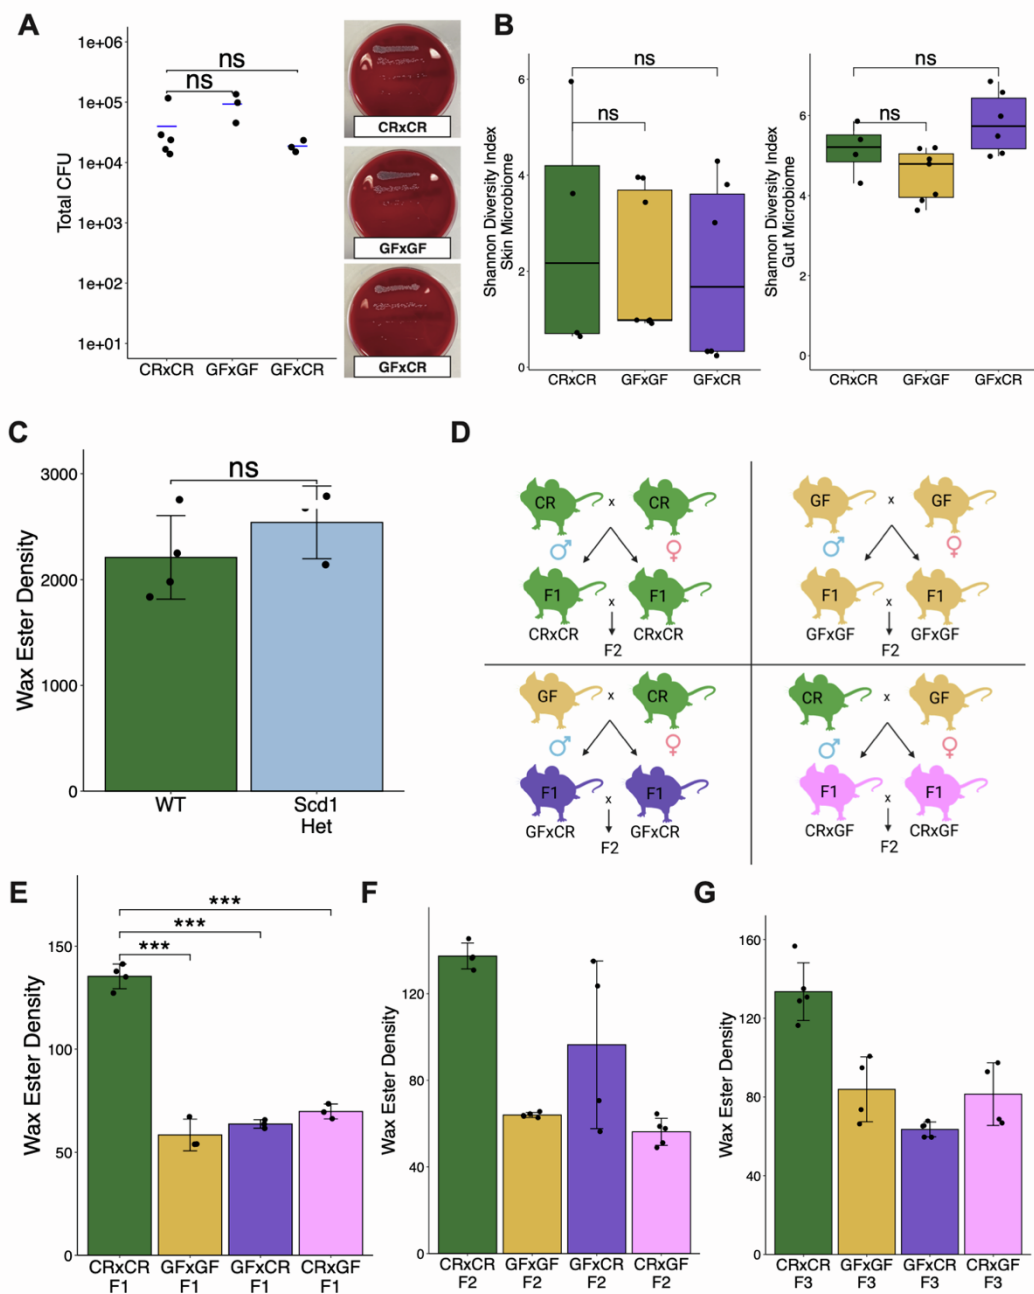

25 **Figure S3. GF sebum defect persists to F<sub>3</sub> generation when using an inter-litter breeding**  
 26 **scheme independent of microbial composition and SG defects, Related to Figure 3. (A) CFU**  
 27 **quantification from back swabs of F<sub>1</sub> CR×CR, GF×GF, and GF×CR mice. (B) Alpha diversity**  
 28 **(Shannon Diversity Index) measurement of skin and gut microbial compositions comparing F<sub>2</sub>**

29 CR×CR, GF×GF, and GF×CR mice ( $n = 4$  to  $7$  mice/group) (C) TLC quantification of hair wax  
30 esters comparing WT to *Scd1*<sup>+/-</sup> mice ( $n = 3$  to  $4$  mice/group) (D) Breeding scheme for  
31 alternative transgenerational experiments using littermates for multigenerational breeding. (E to  
32 G) TLC quantification of hair wax esters from combinatorial CR and GF natural breeding in the  
33 (E) F<sub>1</sub> ( $n = 3$  to  $4$  mice/group), (F) F<sub>2</sub> ( $n = 4$  to  $5$  mice/group), and (G) F<sub>3</sub> ( $n = 4$  to  $5$  mice/group)  
34 generations. ns, not significant, \* $p < 0.05$ , \*\* $p < 0.01$ , \*\*\* $p < 0.001$ , \*\*\*\* $p < 0.0001$  by Student  
35 *t* test. Data are shown as mean  $\pm$  SD.

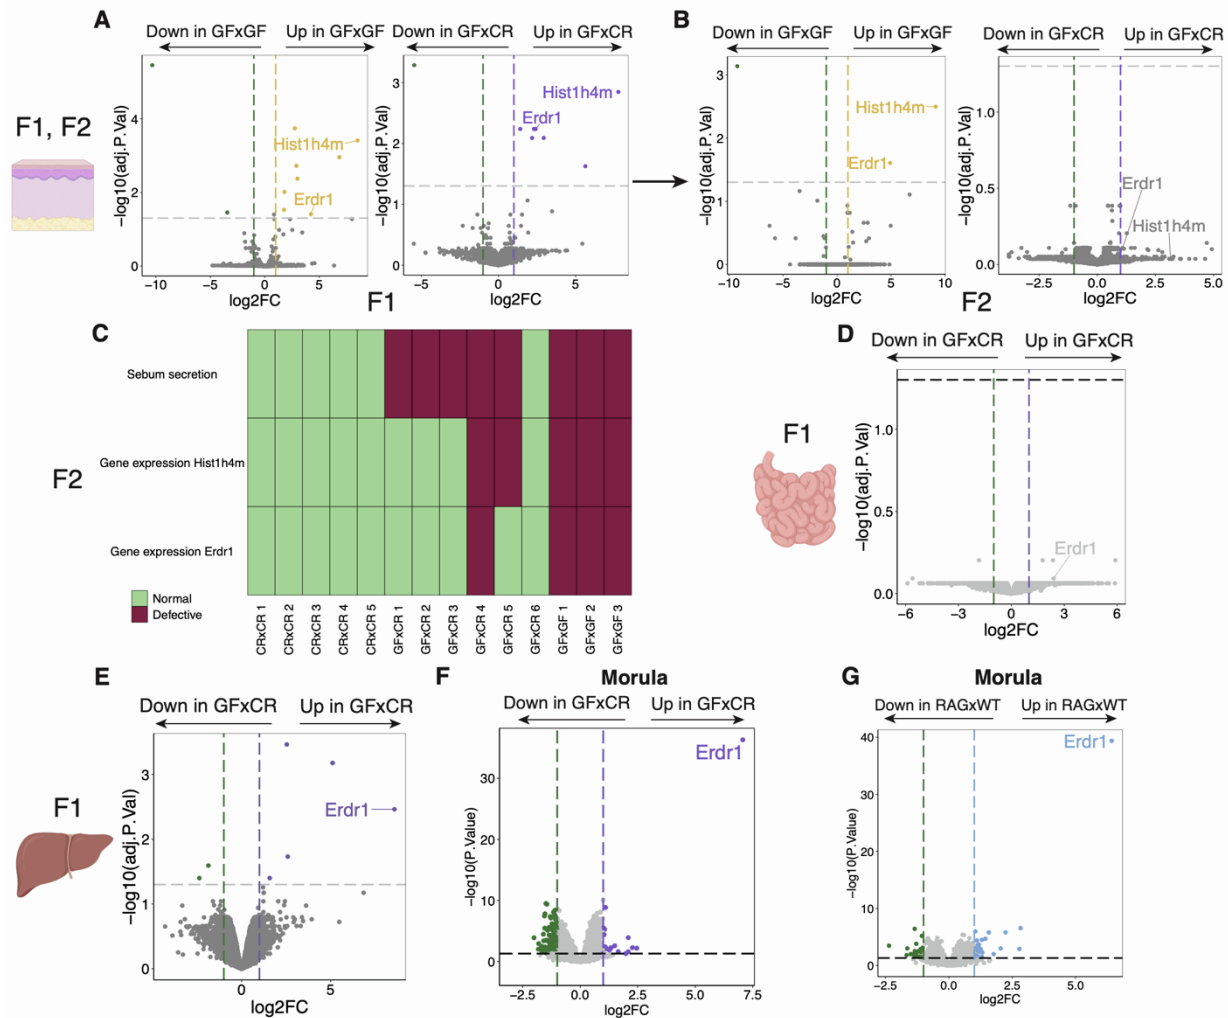

36

37 **Figure S4. Effect of the absence of the microbiome or T cells on gene expression in multiple**

38 **tissues in the F<sub>1</sub> or F<sub>2</sub> generations, Related to Figures 4, 5, and 6. (A and B) Gene expression**

39 **by RNA-seq of F<sub>1</sub> and F<sub>2</sub> CR×CR, GF×GF, and GF×CR back skin (*n* = 3 to 6 mice/group). Volcano**

40 **plots representing pairwise group comparisons of DEGs (using Benjamini-Hochberg adjusted p-**

41 **value) across (A) F<sub>1</sub> and (B) F<sub>2</sub> generations, highlighting two common genes. (C) Heatmap**

42 **comparing recovery of sebum secretion or gene expression of *Hist1h4m* and *Erdr1* in F<sub>2</sub> GF×CR**

43 **and GF×GF mice (D) Gene expression by RNA-seq of F<sub>1</sub> CR×CR and GF×CR small intestine (*n***

44 **= 3 or 4 mice/group) portraying DEGs (using Benjamini-Hochberg adjusted p-value). (E) Gene**

45 **expression by RNA-seq of F<sub>1</sub> and CR×CR and GF×CR liver tissue (*n* = 3 or 4 mice/group)**

46 portraying DEGs (using Benjamini-Hochberg adjusted p-value). **(F)** Gene expression by RNA-seq  
47 of CR×CR and GF×CR morulae ( $n =$  at least 17 morulae/group, collected over three biological  
48 replicates of IVF). **(G)** Gene expression by RNA-seq of WT×WT and RAG×WT morulae ( $n =$  at  
49 least 28 morulae/group, collected over three biological replicates of IVF). Sequencing experiments  
50 performed once.



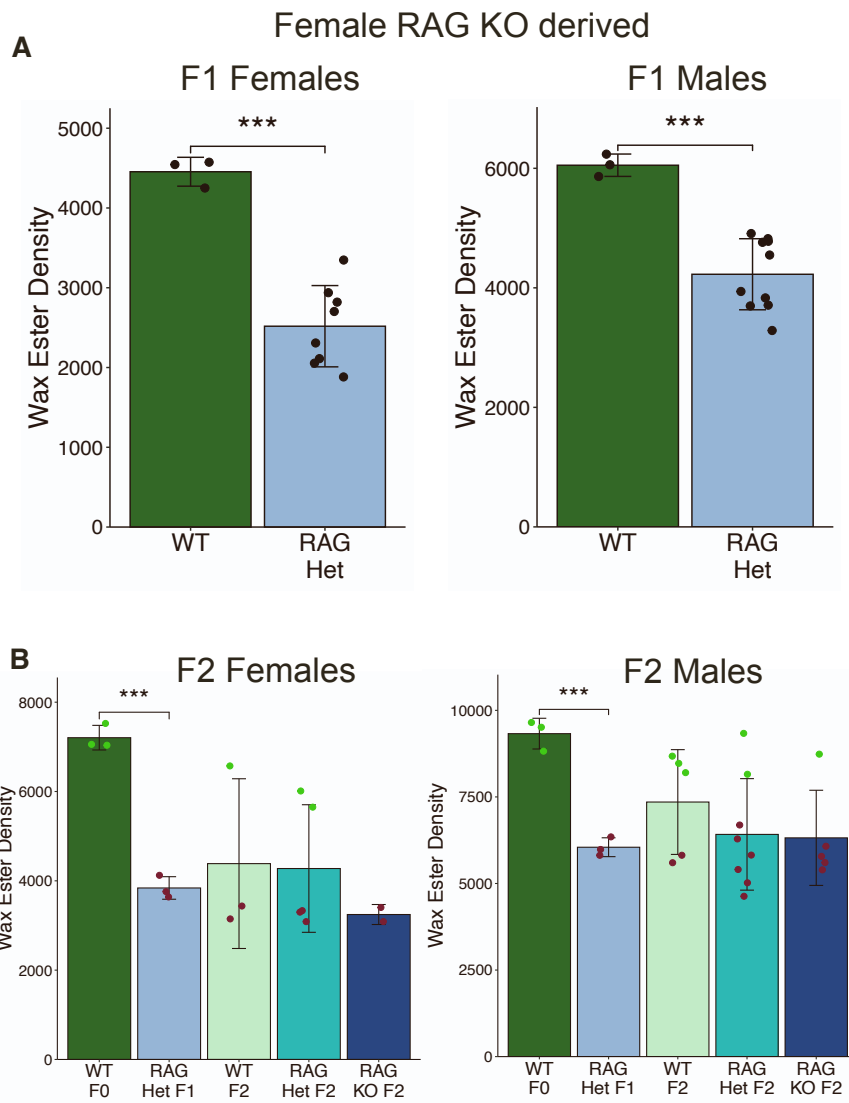

51

52 **Figure S5. *Rag2*<sup>-/-</sup> female mice crossed with WT male mice also lead to defective *Rag2*<sup>+/-</sup> F<sub>1</sub>**

53 **mice and partially rescued F<sub>2</sub> mice independent of genotype, Related to Figure 6. (A) TLC**

54 **quantification of hair wax esters from female and male WT and F<sub>1</sub> *Rag2*<sup>+/-</sup> mice (*n* = 3 (WT) or**

55 **8-10 (*Rag2*<sup>+/-</sup>) mice/group). Experiment performed twice. (B) TLC quantification of hair wax**

56 **esters from female and male WT, F<sub>1</sub> *Rag2*<sup>+/-</sup>, and F<sub>2</sub> WT, *Rag2*<sup>+/-</sup>, and *Rag2*<sup>-/-</sup> mice (*n* = 2 to 8**

57 **mice/group). Point colors represent physiologic (green) or defective (red) levels of sebum**

58 **secretion. \*\*\**p* < 0.001 by Student *t* test. Data are shown as mean ± SD.**
